# Supplementary material
Source: PubMed Central journal article supplement (PMC1615895)
Supplement: bj3990387add.pdf [file bj3990387add.pdf]

**SUPPORTING MATERIAL****TABLE S1:** Chemical shifts (ppm)

| Residue | NH   | $\alpha$ H | $\beta$ H  | Others                                                                                                                     |
|---------|------|------------|------------|----------------------------------------------------------------------------------------------------------------------------|
| 1. Asp  | -    | 4.06       | 2.41, 2.56 |                                                                                                                            |
| 2. Val  | 8.50 | 4.28       | 1.92       | $\gamma$ CH <sub>3</sub> 0.75*, 0.82*                                                                                      |
| 3. Pro  | -    | 4.11       | 1.48, 1.97 | $\gamma$ CH <sub>2</sub> 1.78*<br>$\delta$ CH <sub>2</sub> 3.49, 3.64                                                      |
| 4. Cys  | 8.19 | 4.24       | 2.77, 2.85 |                                                                                                                            |
| 5. Phe  | 8.31 | 4.38       | 2.75, 2.92 | $\delta$ CH 7.05<br>$\epsilon$ CH 7.15<br>$\xi$ CH 7.09                                                                    |
| 6. Gly  | 8.24 | 3.34, 3.86 |            |                                                                                                                            |
| 7. Trp  | 8.35 | 4.47       | 3.14, 3.02 | $\delta$ CH 7.06<br>$\epsilon^1$ NH 10.09<br>$\epsilon^3$ CH 7.46<br>$\xi^2$ CH 7.28<br>$\xi^3$ CH 6.95<br>$\eta$ CH 7.018 |
| 8. Cys  | 8.05 | 4.32       | 2.73, 2.96 |                                                                                                                            |
| 9. Gln  | 8.04 | 4.00       | 1.65*      | $\gamma$ CH <sub>2</sub> 1.84, 1.77<br>$\epsilon$ NH <sub>2</sub> 6.70, 7.41                                               |
| 10. Asp | 8.25 | 4.40       | 2.43, 2.58 |                                                                                                                            |
| 11. Ala | 7.70 | 3.92       | 1.13*      |                                                                                                                            |

\* Chemical shifts representing peaks of degenerated protons.

**TABLE S2:** NOE constraints

| Atom1  |            | Atom2  |              | Upper limit (Å) |
|--------|------------|--------|--------------|-----------------|
| 1. Asp | $\alpha$ H | 2. Val | NH           | 3.5             |
| 2. Val | NH         |        | $\beta$ H    | 3.5             |
|        |            |        | $\gamma$ H   | 3.5             |
|        | $\alpha$ H |        | $\gamma$ H   | 3.5             |
|        |            | 3. Pro | $\delta$ H   | 3.5             |
| 3. Pro | $\alpha$ H | 4. Cys | NH           | 2.8             |
|        | $\beta$ H  | 3. Pro | $\delta$ H   | 3.5             |
|        |            | 4. Cys | NH           | 5.0             |
|        | $\gamma$ H | 3. Pro | $\delta$ H   | 3.5             |
| 4. Cys | NH         | 8. Cys | NH           | 3.5             |
|        |            | 4. Cys | $\beta$ H    | 3.5             |
|        | $\alpha$ H | 5. Phe | NH           | 2.8             |
| 5. Phe | NH         |        | $\beta$ H    | 3.5             |
|        | $\alpha$ H |        | $\delta$ H   | 3.5             |
|        |            | 6. Gly | NH           | 5.0             |
|        | $\beta$ H  | 5. Phe | $\delta$ H   | 3.5             |
|        |            |        | $\epsilon$ H | 5.0             |
|        |            | 6. Gly | NH           | 3.5             |
|        | $\delta$ H | 6. Gly | NH           | 5.0             |
|        |            | 7. Trp | NH           | 3.5             |
|        |            | 8. Cys | NH           | 5.0             |
| 6. Gly | NH         | 9. Gln | $\beta$ H    | 5.0             |
|        |            |        | $\gamma$ H   | 5.0             |
|        | $\alpha$ H | 7. Trp | NH           | 2.8             |
|        |            |        | $\beta$ H    | 3.5             |
| 7. Trp | NH         | 7. Trp | $\beta$ H    | 3.5             |
|        |            |        | $\delta$ H   | 5.0             |

|         |                         |         |                         |     |
|---------|-------------------------|---------|-------------------------|-----|
|         |                         |         | $\epsilon^3\text{H}$    | 5.0 |
|         |                         | 8. Cys  | NH                      | 3.5 |
|         | $\alpha\text{H}$        |         | NH                      | 3.5 |
|         | $\beta\text{H}$         | 7. Trp  | $\epsilon^3\text{H}$    | 3.5 |
|         |                         |         | $\delta\text{H}$        | 3.5 |
|         |                         | 8. Cys  | NH                      | 5.0 |
|         | $\epsilon^1\text{H}$    | 7. Trp  | $\xi^2\text{H}$         | 3.5 |
|         | $\epsilon^3\text{H}$    | 7. Trp  | $\eta\text{H}$          | 3.5 |
|         |                         |         | $\xi^2\text{H}$         | 3.5 |
|         |                         | 8. Cys  | NH                      | 3.5 |
|         | $\eta\text{H}$          | 9. Gln  | $\epsilon^2\text{H}$    | 5.0 |
| 8. Cys  | NH                      | 8. Cys  | $\alpha\text{H}$        | 5.0 |
|         |                         |         | $\beta\text{H}$         | 3.5 |
| 9. Gln  | NH                      | 9. Gln  | $\beta\text{H}$         | 3.5 |
|         |                         |         | $\gamma\text{H}$        | 3.5 |
|         |                         | 10. Asp | NH                      | 3.5 |
|         | $\alpha\text{H}$        | 9. Gln  | $\beta\text{H}$         | 5.0 |
|         |                         |         | $\gamma\text{H}$        | 3.5 |
|         |                         | 10. Asp | NH                      | 2.8 |
|         | $\epsilon^{21}\text{H}$ | 9. Gln  | $\epsilon^{22}\text{H}$ | 2.8 |
| 10. Asp | NH                      | 10. Asp | $\beta\text{H}$         | 3.5 |
|         |                         | 11. Ala | NH                      | 5.0 |
|         | $\alpha\text{H}$        |         | NH                      | 3.5 |
| 11. Ala | NH                      |         | $\beta\text{H}$         | 5.0 |

---
